# Supplementary material
Source: PubMed Central journal article supplement (PMC3878299)
Supplement: NIHMS427512-supplement-Supp_Data.pdf [file NIHMS427512-supplement-Supp_Data.pdf]

# Supplementary Materials for

## HLA Class I Molecules Partner with Integrin $\beta_4$ to Stimulate Endothelial Cell Proliferation and Migration

Xiaohai Zhang, Enrique Rozengurt, Elaine F. Reed\*

\*To whom correspondence should be addressed. E-mail: ereed@mednet.ucla.edu

Published 23 November 2010, *Sci. Signal.* **3**, ra85 (2010)

DOI: 10.1126/scisignal.2001158

### The PDF file includes:

Fig. S1. Immunoprecipitation with an integrin  $\beta_1$ -specific antibody fails to pull down integrin  $\beta_4$  and the HLA-I heavy chain in endothelial cells.

Fig. S2. Knockdown of integrin  $\beta_4$  blocks HLA-I-mediated phosphorylation of target proteins in endothelial cells.

Fig. S3. The cytoplasmic domain of the HLA-I heavy chain is required for HLA-I-mediated cell proliferation.

Fig. S4. Knockdown of the HLA-I heavy chain inhibits the phosphorylation of ERK.

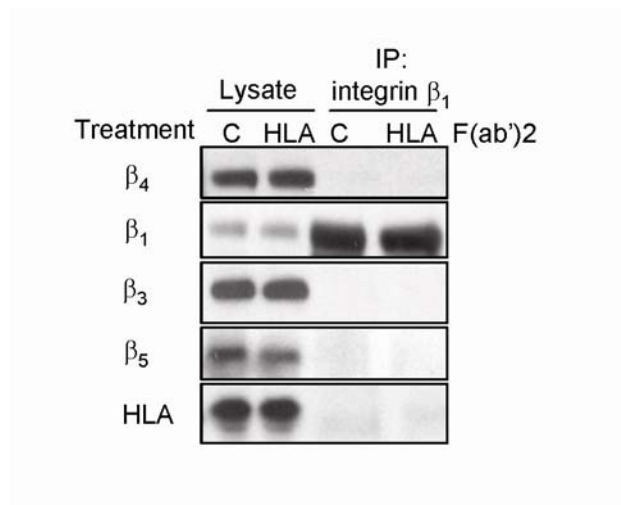

**Fig. S1.** Immunoprecipitation with an integrin  $\beta_1$ -specific antibody fails to pull down integrin  $\beta_4$  and the HLA-I heavy chain in endothelial cells. Endothelial cells (EC1) were stimulated with the F(ab')<sub>2</sub> fragments of the HLA-I-specific antibody W6/32 or with control IgG. Cell lysates were subjected to immunoprecipitation with antibody against the integrin  $\beta_1$  subunit, and were analyzed by Western blotting with antibodies against the heavy chain of HLA-I (EMR8-5) and integrins  $\beta_4$ ,  $\beta_1$ ,  $\beta_3$ , and  $\beta_5$ . The data are representative of three independent experiments.

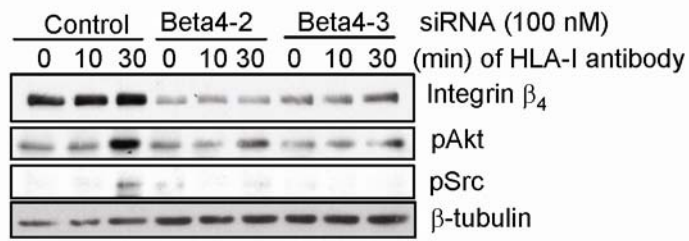

**Fig. S2.** Knockdown of integrin  $\beta_4$  blocks HLA-I-mediated phosphorylation of target proteins in endothelial cells. Endothelial cells (EC1) were transfected with 100 nM of either of the integrin  $\beta_4$ -specific siRNAs Beta4-2 (5'-CAGAAGAUGUGGAUGAGUU-3') or Beta4-3 (5'-GAGCUGCACGGAGUGUGUC-3'), which are targeted to different regions of the integrin  $\beta_4$  mRNA, or with control siRNA. After 48 hours, cells were stimulated with W6/32 (1  $\mu$ g/ml) for 10 or 30 min, lysed, and analyzed by Western blotting with antibodies against pAkt (Ser<sup>473</sup>) and pSrc (Tyr<sup>416</sup>).  $\beta$ -tubulin served as a loading control. The data are representative of two independent experiments.

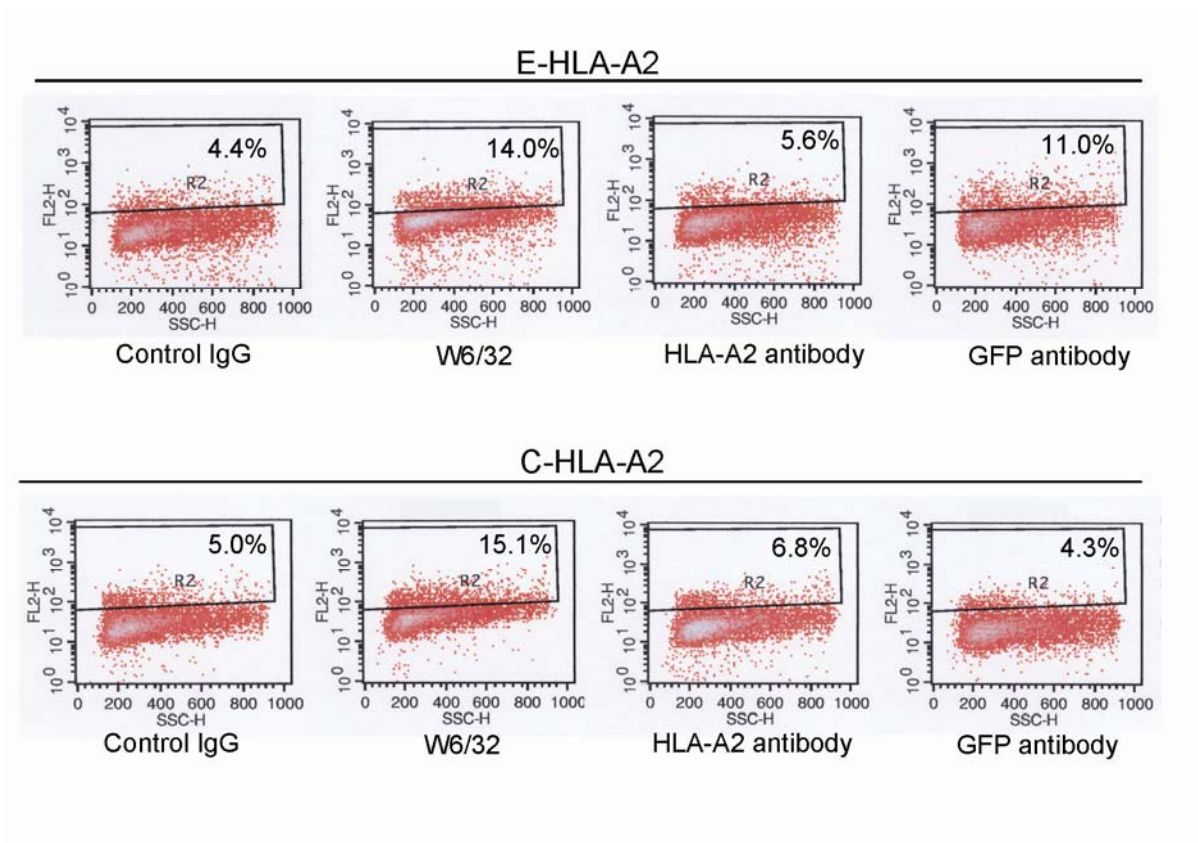

**Fig. S3.** The cytoplasmic domain of the HLA-I heavy chain is required for HLA-I-mediated cell proliferation. Endothelial cells (EC2) were infected with adenoviruses encoding E-HLA-A2 or C-HLA-A2. After 48 hours, the cells were stimulated with antibodies against GFP or HLA-A2 in the presence of BrdU. Cells stimulated with mouse IgG and W6/32 serve as negative and positive controls, respectively. BrdU positive cells are gated as the R2 region. The data are representative of three independent experiments.

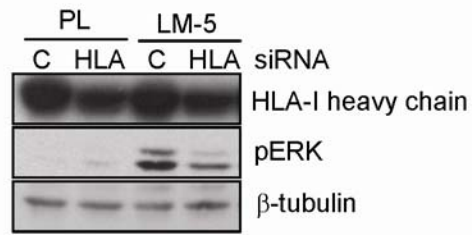

**Fig. S4.** Knockdown of the HLA-I heavy chain inhibits the phosphorylation of ERK. Cells transfected with siRNA against the HLA-I heavy chain (5'-GAGCUCAGAUAGAAAAGGA-3') or with control siRNA were plated on poly-L-lysine (PL) or laminin-5 (LM-5) for 30 min, after which lysates were prepared, resolved by SDS-PAGE, and analyzed by Western blotting with antibodies against pERK and the HLA-I heavy chain.  $\beta$ -tubulin was used as a loading control. The data are representative of two independent experiments.
